# Supplementary material for: Chemical selectivity of nucleobase adduction relative to in vivo mutation sites on exon 7 fragment of p53 tumor suppressor gene
Source: Royal Society of Chemistry journal article supplement (doi:10.1039/c5sc01403d), 2015-01-01
Supplement: c5sc01403d1.pdf [file c5sc01403d1.pdf]

## CHEMICAL SELECTIVITY OF NUCLEOBASE ADDUCTION RELATIVE TO IN VIVO MUTATION SITES ON EXON 7 FRAGMENT OF P53 TUMOR SUPPRESSOR GENE

Spundana Malla, Karteek Kadimisetty, You-Jun Fu, Dharamainder Choudhary, Ingela Jansson, John B. Schenkman, James F. Rusling\*

### SUPPORTING INFORMATION

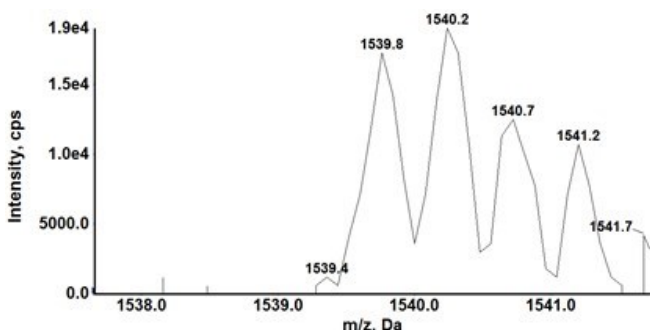

**Figure S1.** Isotopic distribution pattern for ss-DNA Fragment 1,  $m/z$  1540.5  $z=-2$ , measured on a Qtrap mass spectrometer

**Table S1:** Calculated multiple charged species for standard and single adducted ss-Fragment 1.

| ss-Fragment 1 : GGCGGCATG |          |                 |
|---------------------------|----------|-----------------|
| Charge                    | m/z      |                 |
|                           | Standard | Singly Adducted |
| -1                        | 2778.854 | 3081.177        |
| -2                        | 1388.923 | 1540.084        |
| -3                        | 925.612  | 1026.386        |
| -4                        | 693.957  | 769.538         |
| -5                        | 554.964  | 615.429         |
| -6                        | 462.302  | 512.689         |
| -7                        | 396.115  | 439.304         |
| -8                        | 346.474  | 384.264         |

Singly adducted ss-DNA Fragment 4 has  $m/z$  of 1480.2 with a charge of -2. Extracted ion chromatogram (XIC) of 1480.2 is as shown in Figure S2A. XIC of 1480.2 showed three major peaks indicating that there are three major adducts on ss-DNA Fragment 4, the complement of fragment 1. MSMS spectra for singly adducted ss-DNA Fragment 4,  $m/z$  1480.2 is as shown in Figure S2B for Peak 1. All  $a_n$ - $b_n$  ions up to  $a_3$ - $b_3$  have  $m/z$  similar to that of standard. Increase in  $m/z$  was observed for  $a_4$ - $b_4$ ,  $a_5$ - $b_5$  and  $a_6$ - $b_6$ . This indicates that the possible modification is on base 3, (CCG\*CCCATG). This was further confirmed with  $w_n$  ions. Increase in  $m/z$  for  $w_7$  and  $w_8$  ions and all ions below  $w_6$  have  $m/z$  similar to that of standard. Table S2 shows the  $m/z$  for standard and adducted ss-DNA Fragment 4.

MSMS spectra for singly adducted ss-DNA Fragment 4,  $m/z$  1480.2 is as shown in Figure S2C for Peak 2. All  $a_n$ - $b_n$  ions up to  $a_7$ - $b_7$  have  $m/z$  similar to that of standard. Increase in  $m/z$  was observed for  $a_8$ - $b_8$ . This indicates that the possible modification is on base 7, (CCGCCCA\*TG). This was further confirmed with  $w_n$  ions. Increase in  $m/z$  for  $w_3$ ,  $w_4$ ,  $w_5$ ,  $w_6$ ,  $w_7$  and  $w_8$  ions and ions  $w_1$  and  $w_2$

have  $m/z$  similar to that of standard. Table S2 shows the  $m/z$  for standard and adducted ss-DNA Fragment 4.

MSMS spectra for singly adducted ss-DNA Fragment 4,  $m/z$  1480.2 is as shown in Figure S2D for Peak 3. All  $a_n$ - $b_n$  ions have  $m/z$  similar to that of standard. This indicates that the possible modification is on base 9, (CCGCCCATG\*). This was further confirmed with  $w_n$  ions showing increase in  $m/z$  for all  $w_n$  ions. Table S2 shows the  $m/z$  for standard and adducted fragment 4.

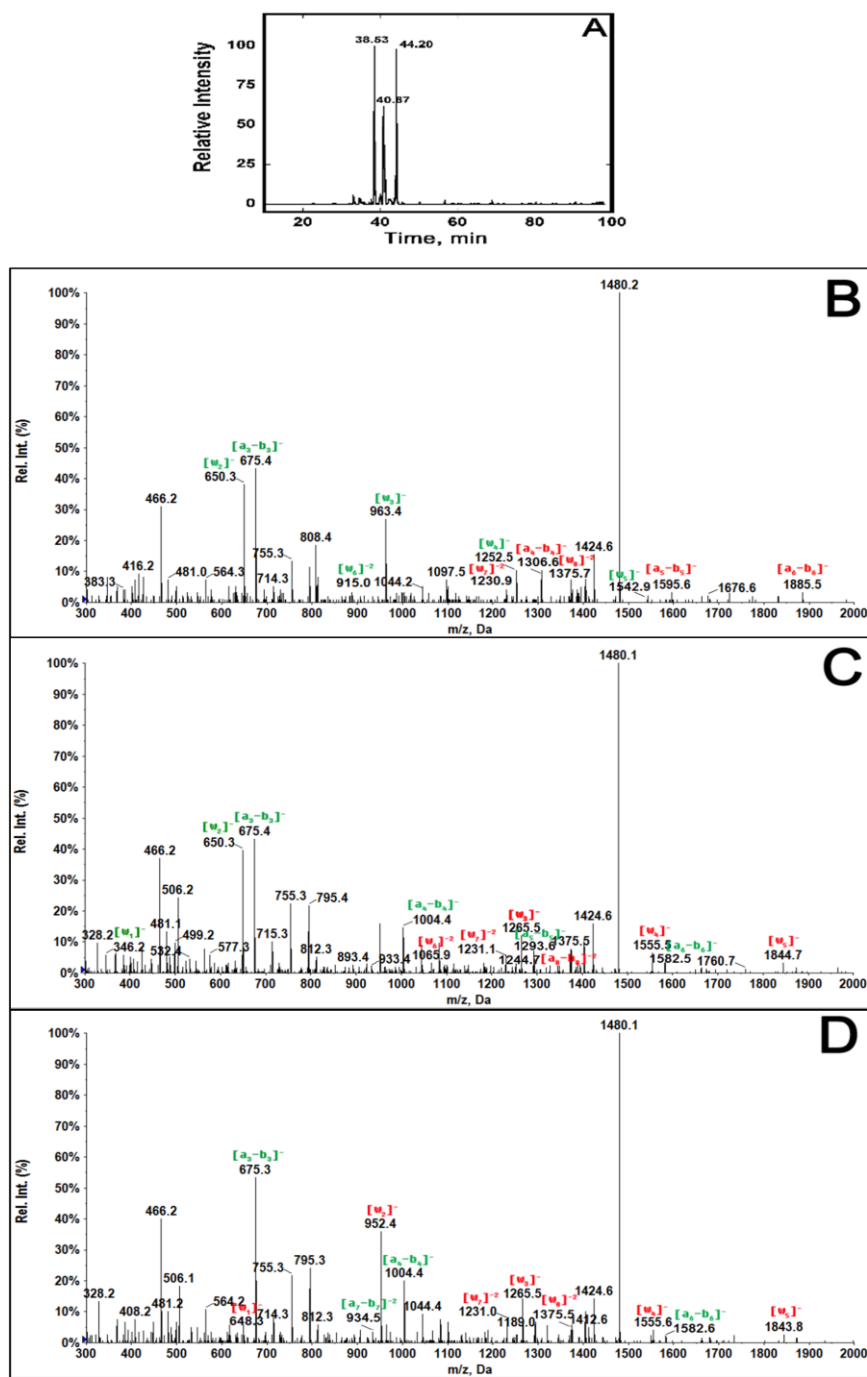

**Figure S2.** LC-MS/MS of ss Fragment 4 (A) Extracted ion chromatogram of singly adducted ss Fragment 4 fragment with  $m/z$  1480.2. (B) MSMS spectra of Peak 1 (C) MSMS spectra of Peak 2 (D) MSMS spectra of Peak 3 showing the obtained  $a_n$ - $b_n$  and  $w_n$  ions. Ions with  $m/z$  similar to standard are shown in green and ions with increased  $m/z$  shown in red.

**Table S2:** Calculated m/z for standard and singly adducted DNA fragments of ss-DNA Fragment 4. (m/z highlighted in red were the ions with increased m/z compared to that of standard corresponding to BPDE adducted)

| Fragment                       | m/z                    |                        |                        |                        |
|--------------------------------|------------------------|------------------------|------------------------|------------------------|
|                                | Standard               | Peak1                  | Peak 2                 | Peak 3                 |
| a <sub>2</sub> -b <sub>2</sub> | [386.2] <sup>-</sup>   | [426.2] <sup>-</sup>   | [386.2] <sup>-</sup>   | [386.2] <sup>-</sup>   |
| a <sub>3</sub> -b <sub>3</sub> | [675.4] <sup>-</sup>   | [675.4] <sup>-</sup>   | [675.4] <sup>-</sup>   | [675.4] <sup>-</sup>   |
| a <sub>4</sub> -b <sub>4</sub> | [1004.4] <sup>-</sup>  | [1306.6] <sup>-</sup>  | [1004.4] <sup>-</sup>  | [1004.4] <sup>-</sup>  |
| a <sub>5</sub> -b <sub>5</sub> | [1293.8] <sup>-</sup>  | [1595.6] <sup>-</sup>  | [1293.8] <sup>-</sup>  | [1293.8] <sup>-</sup>  |
| a <sub>6</sub> -b <sub>6</sub> | [1583.0] <sup>-</sup>  | [1885.5] <sup>-</sup>  | [1582.5] <sup>-</sup>  | [1582.6] <sup>-</sup>  |
| a <sub>7</sub> -b <sub>7</sub> | [1872.2] <sup>-2</sup> | n/d                    | n/d                    | [934.5] <sup>-2</sup>  |
| a <sub>8</sub> -b <sub>8</sub> | [1092.2] <sup>-2</sup> | n/d                    | [1244.7] <sup>-2</sup> | n/d                    |
| w <sub>1</sub>                 | [346.2] <sup>-2</sup>  | [346.2] <sup>-2</sup>  | [346.2] <sup>-2</sup>  | [648.23] <sup>-</sup>  |
| w <sub>2</sub>                 | [650.4] <sup>-</sup>   | [650.3] <sup>-</sup>   | [650.3] <sup>-</sup>   | [952.4] <sup>-</sup>   |
| w <sub>3</sub>                 | [963.6] <sup>-</sup>   | [963.4] <sup>-</sup>   | [1265.5] <sup>-</sup>  | [1265.6] <sup>-2</sup> |
| w <sub>4</sub>                 | [1252.8] <sup>-</sup>  | [1252.5] <sup>-</sup>  | [1555.5] <sup>-</sup>  | [1554.6] <sup>-</sup>  |
| w <sub>5</sub>                 | [1541.9] <sup>-</sup>  | [1542.9] <sup>-</sup>  | [1844.7] <sup>-</sup>  | [1843.8] <sup>-</sup>  |
| w <sub>6</sub>                 | [1831.2] <sup>-</sup>  | [915.0] <sup>-2</sup>  | [1066.6] <sup>-2</sup> | [1066.6] <sup>-2</sup> |
| w <sub>7</sub>                 | [1079.7] <sup>-2</sup> | [1230.9] <sup>-2</sup> | [1231.1] <sup>-2</sup> | [1231.0] <sup>-2</sup> |
| w <sub>8</sub>                 | [1224.3] <sup>-2</sup> | [1375.7] <sup>-2</sup> | [1375.6] <sup>-2</sup> | [1375.5] <sup>-2</sup> |

Singly adducted fragment of ss-DNA Fragment 2 has an m/z of 1511.0 with a charge of -4. Extracted ion chromatogram of 1511.0 is as shown in Figure S3A. XIC of 1511.0 show one major peak indicating that there is one major adduct on ss-DNA Fragment 2.

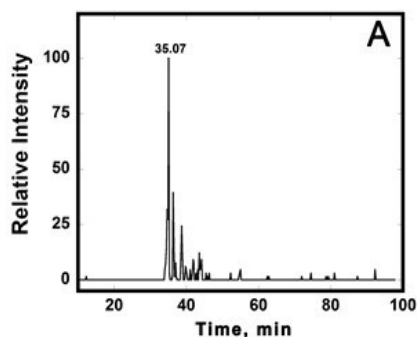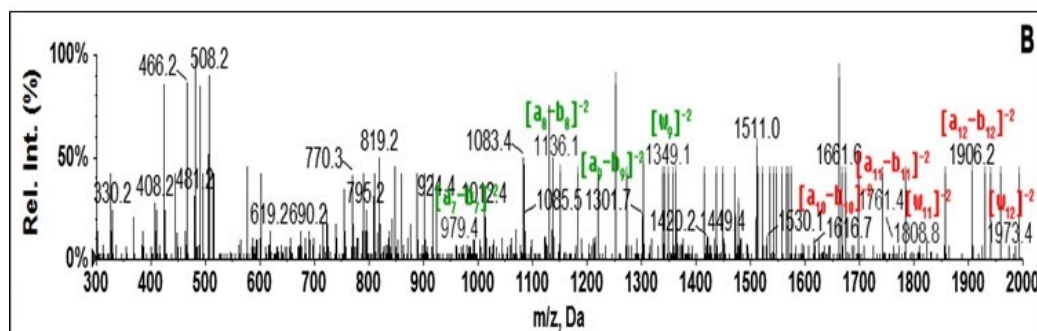

**Figure S3.** LC-MS/MS of ss-DNA fragment 2 (A) Extracted ion chromatogram of singly adducted ss-DNA Fragment 2 fragment, m/z 1511.0.

(B) MSMS spectra of fragment ion 1511.0 showing the obtained a<sub>n</sub>-b<sub>n</sub> and w<sub>n</sub> ions. Ions with m/z similar to standard are shown in green and ions with increased m/z shown in red.

MSMS spectra for singly adducted ss-DNA Fragment 2, m/z 1511.0 is as shown in Figure S3B. All  $a_n$ - $b_n$  ions up to  $a_9$ - $b_9$  have m/z similar to that of standard. Increase in m/z was observed for  $a_{10}$ - $b_{10}$ . This indicates that the possible modification is on base 9, (AACCGGAGG\*CCCATCCTCA). This was further confirmed with  $w_n$  ions. Increase in m/z for  $w_{11}$ ,  $w_{12}$ , and  $w_{13}$  ions and ions below  $w_{10}$  have m/z similar to that of standard. Table S3 shows the m/z for standard and adducted ss-DNA Fragment 2.

**Table S3:** Calculated m/z for standard and singly adducted DNA fragments of ss-DNA Fragment 2. (m/z highlighted in red were the ions with increased m/z compared to that of standard corresponding to BPDE adducted)

| Fragment Ion        | m/z                    |                        |
|---------------------|------------------------|------------------------|
|                     | Standard               | Singly adducted        |
| $a_7$ - $b_7$       | [979.4] <sup>-2</sup>  | [979.4] <sup>-2</sup>  |
| $a_8$ - $b_8$       | [1136.1] <sup>-2</sup> | [1136.1] <sup>-2</sup> |
| $a_9$ - $b_9$       | [1301.0] <sup>-2</sup> | [1301.0] <sup>-2</sup> |
| $a_{10}$ - $b_{10}$ | [1465.5] <sup>-2</sup> | [1616.7] <sup>-2</sup> |
| $a_{11}$ - $b_{11}$ | [1073.0] <sup>-3</sup> | [1761.4] <sup>-2</sup> |
| $a_{12}$ - $b_{12}$ | [1169.4] <sup>-3</sup> | [1906.2] <sup>-2</sup> |
| $w_8$               | [1204.4] <sup>-2</sup> | [1204.4] <sup>-2</sup> |
| $w_9$               | [1349.1] <sup>-2</sup> | [1349.1] <sup>-2</sup> |
| $w_{10}$            | [1492.9] <sup>-2</sup> | [1493.2] <sup>-2</sup> |
| $w_{11}$            | [1657.5] <sup>-2</sup> | [1808.8] <sup>-2</sup> |
| $w_{12}$            | [1214.4] <sup>-3</sup> | [1973.4] <sup>-2</sup> |

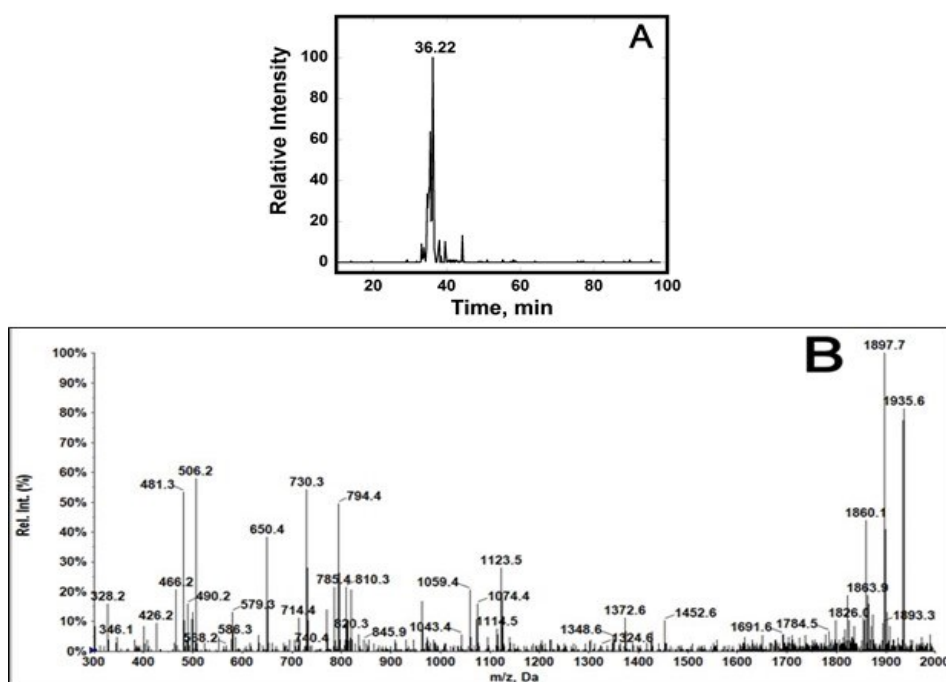

**Figure S4.** LC-MS/MS of ss-DNA Fragment 3 (A) Extracted ion chromatogram of singly adducted ss-DNA Fragment 3, m/z 1935.5. (B) MSMS spectra of fragment ion of m/z, 1935.5 charge -4 showing the obtained  $a_n$ - $b_n$  and  $w_n$  ions. Ions with m/z similar to standard are shown in green and ions with increased m/z shown in red.

Singly adducted ss-DNA Fragment 3 has m/z of 1935.5 with a charge of -4. Extracted ion chromatogram of 1935.5 is as shown in figure S4A. XIC of 1935.5 show one major peak indicating that there is one major adduct on ss-DNA Fragment 4.

MSMS spectra for singly adducted ss-DNA Fragment 3, m/z 1935.5 is as shown in Figure S4B. Increase in m/z for  $w_n$  ions  $w_{20}$ ,  $w_{21}$ ,  $w_{22}$  and  $w_{23}$  indicate that the modification is on 5<sup>th</sup> base (GTGAG\*GATGGGCTCCGGTTCATG).

### 32 base pair DNA DATA

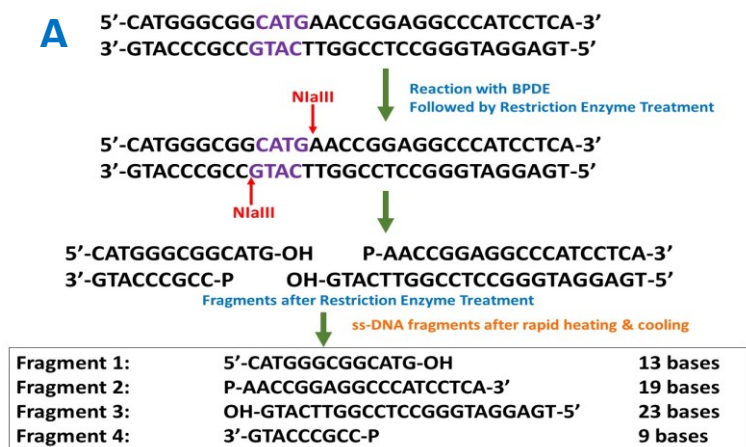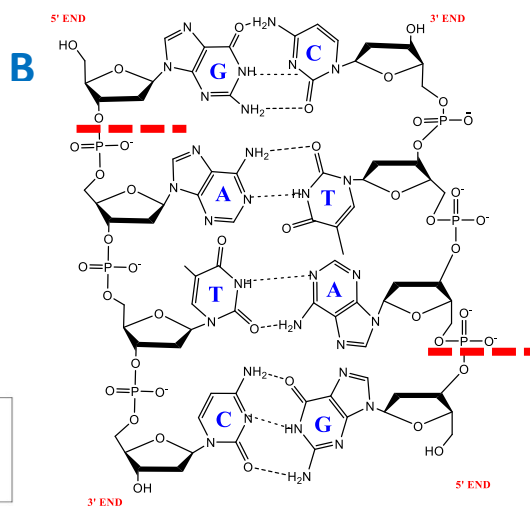

**Scheme S1.** A) Protocol for reaction of 32 base pairs DNA fragment with BPDE followed by restriction enzyme treatment and possible fragments. B) Example of bond breaking between O and P if restriction enzyme acts between G and A.

**Table S4:** Calculated m/z for standard and singly adducted DNA fragments obtained after restriction enzyme treatment of 32 base pair DNA (A) Fragment 1 (B) Fragment 2 (C) Fragment 3 (D) Fragment 4. m/z highlighted in red were the ions detected in MS spectrum.

| (A) Fragment 1<br>5'-CATGGGCGGCATG-OH              |          |                 | (B) Fragment 2<br>P-AACCGGAGGCCATCCTCA-OH          |          |                 |
|----------------------------------------------------|----------|-----------------|----------------------------------------------------|----------|-----------------|
| Charge                                             | Standard | Single adducted | Charge                                             | Standard | Single adducted |
| -1                                                 | 4014.656 | 4316.979        | -1                                                 | 5821.771 | 6124.094        |
| -2                                                 | 2006.824 | 2157.986        | -2                                                 | 2910.381 | 3061.543        |
| -3                                                 | 1337.546 | 1438.320        | -3                                                 | 1939.918 | 2040.692        |
| -4                                                 | 1002.908 | 1078.489        | -4                                                 | 1454.686 | 1530.267        |
| -5                                                 | 802.124  | 862.589         | -5                                                 | 1163.547 | 1224.012        |
| Charges up to -12 are possible only few shown here |          |                 | Charges up to -18 are possible only few shown here |          |                 |

  

| (C) Fragment 3<br>OH-GTACTTGGCCTCCGGGTAGGAGT-OH |          |                 | (D) Fragment 4<br>OH-GTACCCGCC-P                  |          |                 |
|-------------------------------------------------|----------|-----------------|---------------------------------------------------|----------|-----------------|
| Charge                                          | Standard | Single adducted | Charge                                            | Standard | Single adducted |
| -1                                              | 7110.654 | 7412.977        | -1                                                | 2738.759 | 3041.082        |
| -2                                              | 3554.823 | 3705.985        | -2                                                | 1368.875 | 1520.037        |
| -3                                              | 2369.546 | 2470.320        | -3                                                | 912.247  | 1013.021        |
| -4                                              | 1776.907 | 1852.488        | -4                                                | 683.933  | 759.514         |
| -5                                              | 1421.324 | 1481.789        | Charges up to -8 are possible only few shown here |          |                 |
| -6                                              | 1184.269 | 1234.656        |                                                   |          |                 |

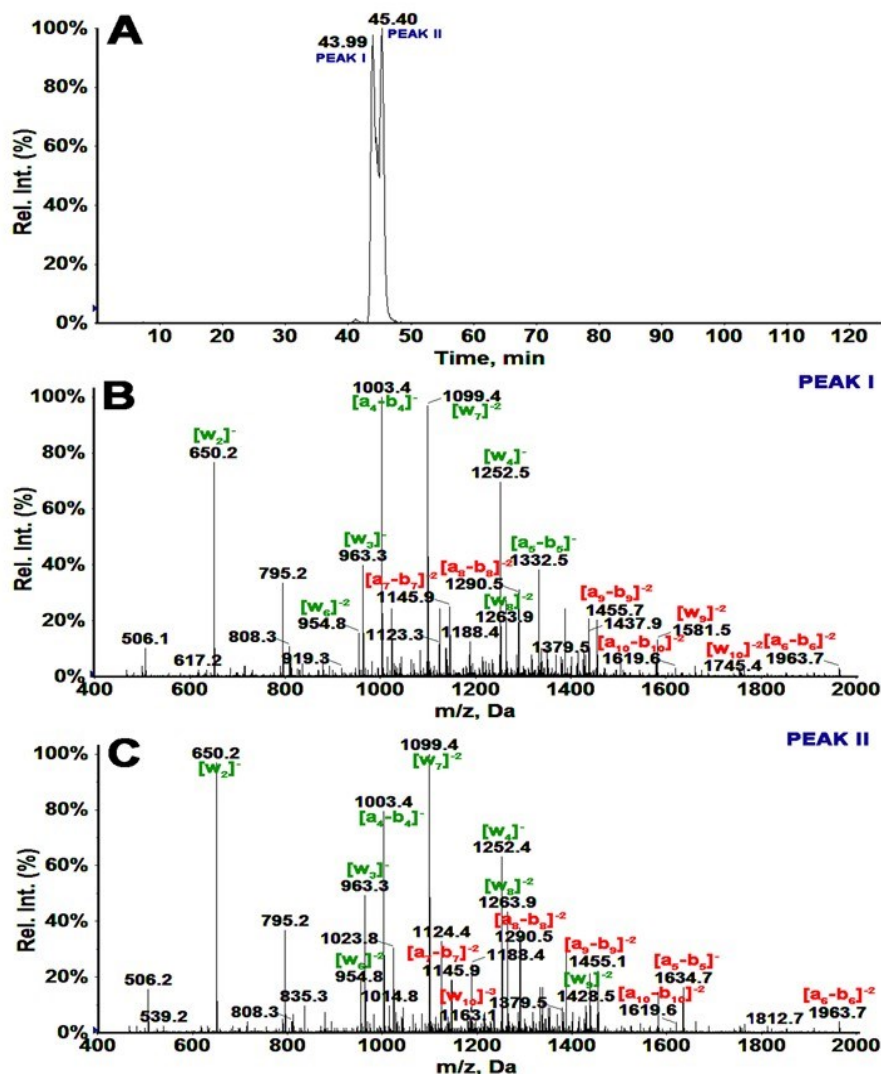

**Figure S5.** LC-MS of ds-32 bp exon 7 probe: (A) Extracted ion chromatogram of singly adducted fragment 1, m/z 1438.2. (B) MSMS spectra of Peak 1 (C) MSMS spectra of Peak 2 showing the obtained  $a_n$ - $b_n$  and  $w_n$  ions. Ions with m/z similar to standard are shown in green and ions with increased m/z shown in red.

Singly adducted fragment 1 has an m/z of 1438.2 with a charge of -3. Extracted ion chromatogram of 1438.2 is shown in Figure S6A. XIC of 1223.8 show two major peaks indicating that there are two major adduct on Fragment 1.

MSMS spectra for singly adducted Fragment 1, m/z 1438.2 is as shown in Figure S6B for Peak 1. All  $a_n$ - $b_n$  ions up to  $a_5$ - $b_5$  have m/z similar to that of standard. Increase in m/z was observed for  $a_6$ - $b_6$ ,  $a_7$ - $b_7$ ,  $a_8$ - $b_8$ . This indicates that the possible modification is on base 5, (CATGG\*GCGGCATG). This was further confirmed with  $w_n$  ions. Increase in m/z for  $w_9$  and  $w_{10}$  ions and all ions below  $w_8$  have m/z similar to that of standard. Table showing the m/z for standard and adducted Fragment 1 is as shown in Table S5.

MSMS spectra for singly adducted Fragment 1, m/z 1438.2 is as shown in Figure S6C for Peak 2. All  $a_n$ - $b_n$  ions up to  $a_5$ - $b_5$  have m/z similar to that of standard. Increase in m/z was observed for  $a_5$ - $b_5$ ,  $a_6$ - $b_6$ ,  $a_7$ - $b_7$  and  $a_8$ - $b_8$ . This indicates that the possible modification is on base 4, (CATG\*GGCGGCATG). This was further confirmed with  $w_n$  ions. Increase in m/z for  $w_{10}$  ion and all ions below  $w_9$  have m/z similar to that of standard. Table showing the m/z for standard and adducted Fragment 1 is as shown in Table S5.

**Table S5.** Calculated m/z for standard and singly adducted DNA Fragment 1. (m/z highlighted in red were the ions with increased m/z compared to that of standard corresponding to BPDE adducted)

| Fragment ion      | m/z                    |                        |                        |
|-------------------|------------------------|------------------------|------------------------|
|                   | Unadducted             | Peak 1                 | Peak 2                 |
| $a_4-b_4^-$       | [1003.4] <sup>-</sup>  | [1003.4] <sup>-</sup>  | [1003.4] <sup>-</sup>  |
| $a_5-b_5^-$       | [1332.5] <sup>-</sup>  | [1332.5] <sup>-</sup>  | [1634.7] <sup>-</sup>  |
| $a_6-b_6^-$       | [1661.6] <sup>-</sup>  | [1963.7] <sup>-</sup>  | [1963.7] <sup>-</sup>  |
| $a_7-b_7^-$       | [995.2] <sup>-2</sup>  | [1145.9] <sup>-2</sup> | [1145.9] <sup>-2</sup> |
| $a_8-b_8^-$       | [1139.5] <sup>-2</sup> | [1290.5] <sup>-2</sup> | [1290.5] <sup>-2</sup> |
| $a_9-b_9^-$       | [1304.1] <sup>-2</sup> | [1455.7] <sup>-2</sup> | [1455.1] <sup>-2</sup> |
| $a_{10}-b_{10}^-$ | [1468.5] <sup>-2</sup> | [1619.6] <sup>-2</sup> | [1619.6] <sup>-2</sup> |
| w <sub>2</sub>    | [650.2] <sup>-</sup>   | [650.2] <sup>-</sup>   | [650.2] <sup>-</sup>   |
| w <sub>3</sub>    | [963.3] <sup>-</sup>   | [963.3] <sup>-</sup>   | [963.3] <sup>-</sup>   |
| w <sub>4</sub>    | [1252.5] <sup>-</sup>  | [1252.5] <sup>-</sup>  | [1252.5] <sup>-</sup>  |
| w <sub>5</sub>    | n/d                    | n/d                    | n/d                    |
| w <sub>6</sub>    | [954.8] <sup>-2</sup>  | [954.8] <sup>-2</sup>  | [954.8] <sup>-2</sup>  |
| w <sub>7</sub>    | [1099.4] <sup>-2</sup> | [1099.4] <sup>-2</sup> | [1099.4] <sup>-2</sup> |
| w <sub>8</sub>    | [1263.9] <sup>-2</sup> | [1263.9] <sup>-2</sup> | [1263.9] <sup>-2</sup> |
| w <sub>9</sub>    | [1428.7] <sup>-2</sup> | [1581.5] <sup>-2</sup> | [1428.5] <sup>-2</sup> |
| w <sub>10</sub>   | [1593.3] <sup>-2</sup> | [1745.4] <sup>-2</sup> | [1163.1] <sup>-3</sup> |

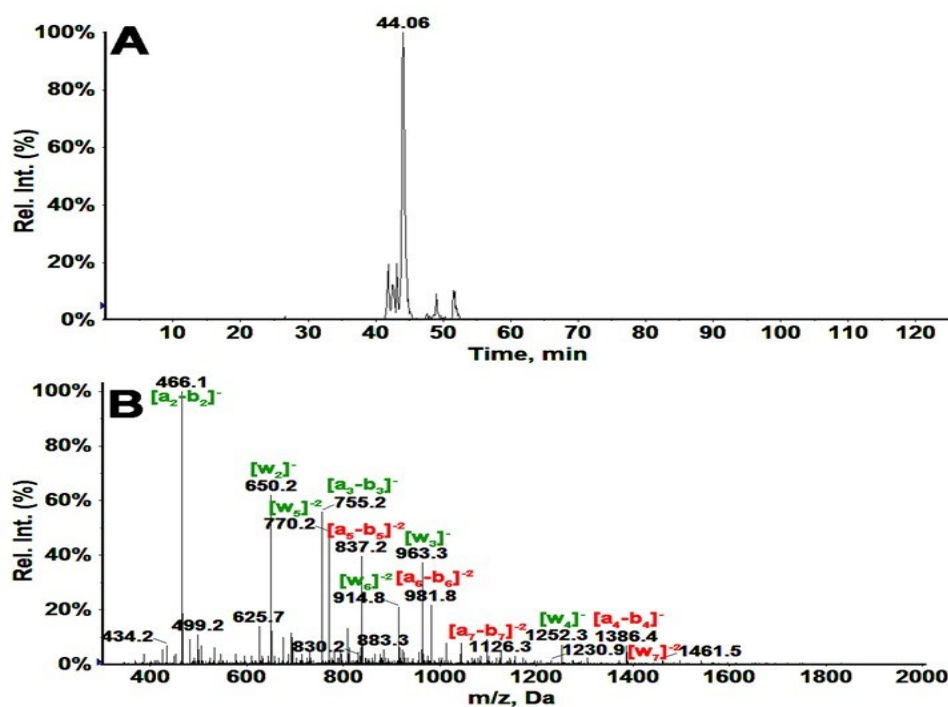

**Figure S6.** LC-MS of ds-32 bp exon 7 probe: (A) Extracted ion chromatogram of singly adducted Fragment 4, m/z 1012.6. (B) MSMS spectra of m/z 1012.6 showing the obtained a<sub>n</sub>-b<sub>n</sub> and w<sub>n</sub> ions. Ions with m/z similar to standard are shown in green and ions with increased m/z shown in red

Singly adducted Fragment 4 has an m/z of 1012.6 with a charge of -3. Extracted ion chromatogram of 1012.6 is as shown in Figure S7A. XIC of 1012.6 show one major peak indicating that there is one major adduct on Fragment 4.

MSMS spectra for singly adducted Fragment 4, m/z 1012.6 is as shown in Figure S7B. All  $a_n$ - $b_n$  ions up to  $a_3$ - $b_3$  have m/z similar to that of standard. Increase in m/z was observed for  $a_4$ - $b_4$ ,  $a_5$ - $b_5$ ,  $a_6$ - $b_6$ ,  $a_7$ - $b_7$  and  $a_8$ - $b_8$ . This indicates that the possible modification is on base 3, (CCG\*CCCATG). This was further confirmed with  $w_n$  ions. Increase in m/z for  $w_7$  ion and all ions below  $w_6$  have m/z similar to that of standard. Table showing the m/z for standard and adducted Fragment 4 is as shown in Table S6.

**Table S6.** Calculated m/z for standard and singly adducted Fragment 4. (m/z highlighted in red were the ions with increased m/z compared to that of standard corresponding to BPDE adducted)

| Fragment ion  | m/z                    |                        |
|---------------|------------------------|------------------------|
|               | Unadducted             | Singly Adducted        |
| $a_2$ - $b_2$ | [466.1] <sup>-</sup>   | [466.1] <sup>-</sup>   |
| $a_3$ - $b_3$ | [755.2] <sup>-</sup>   | [755.2] <sup>-</sup>   |
| $a_4$ - $b_4$ | [1084.8] <sup>-</sup>  | [1386.4] <sup>-</sup>  |
| $a_5$ - $b_5$ | [1373.8] <sup>-</sup>  | [837.2] <sup>-2</sup>  |
| $a_6$ - $b_6$ | [1663.0] <sup>-</sup>  | [981.8] <sup>-2</sup>  |
| $a_7$ - $b_7$ | [975.6] <sup>-2</sup>  | [1126.3] <sup>-2</sup> |
| $a_8$ - $b_8$ | [1132.2] <sup>-2</sup> | n/d                    |
| $w_2$         | [650.2] <sup>-</sup>   | [650.2] <sup>-</sup>   |
| $w_3$         | [963.3] <sup>-</sup>   | [963.3] <sup>-</sup>   |
| $w_4$         | [1252.5] <sup>-</sup>  | [1252.3] <sup>-</sup>  |
| $w_5$         | [1541.7] <sup>-</sup>  | [770.2] <sup>-2</sup>  |
| $w_6$         | [915.1] <sup>-2</sup>  | [914.8] <sup>-2</sup>  |
| $w_7$         | [1079.4] <sup>-2</sup> | [1230.9] <sup>-2</sup> |

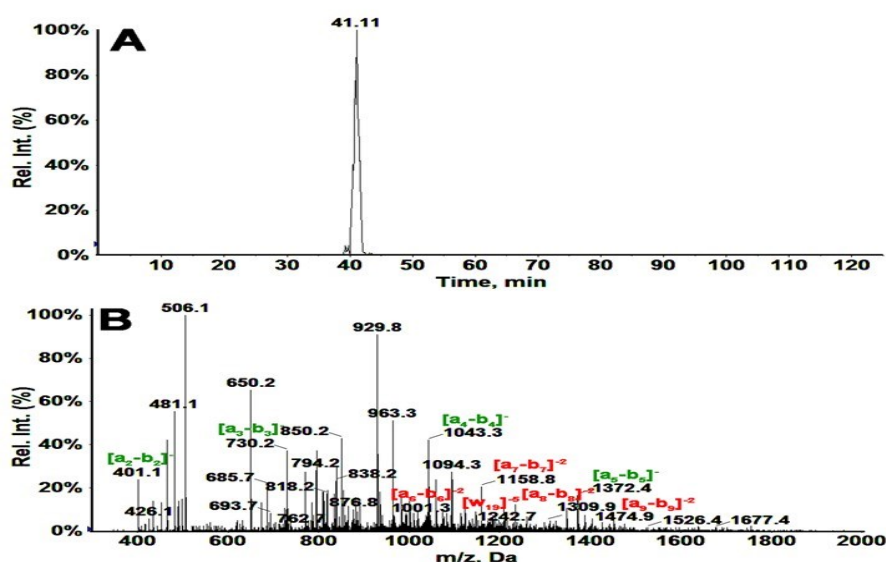

**Figure S7.** LC-MS of ds-32 bp exon 7 probe: (A) Extracted ion chromatogram of singly adducted Fragment 3, m/z 1234.4 (B) MSMS spectra of fragment ion m/z, 1234.4 showing the obtained  $a_n$ - $b_n$  and  $w_n$  ions. Ions with m/z similar to standard are shown in green and ions with increased m/z shown in red



Singly adducted Fragment 3 has an m/z of 1234.4 with a charge of -6. Extracted ion chromatogram of 1234.4 is as shown in Figure S8A. XIC of 1012.6 show one major peak indicating that there is one major adduct on Fragment 3. MSMS spectra for singly adducted Fragment 3, m/z 1234.4 is as shown in Figure S8B. All a<sub>n</sub>-b<sub>n</sub> ions up to a<sub>5</sub>-b<sub>5</sub> have m/z similar to that of standard. Increase in m/z was observed for a<sub>6</sub>-b<sub>6</sub>, a<sub>7</sub>-b<sub>7</sub> and a<sub>8</sub>-b<sub>8</sub> and w<sub>19</sub>. This indicates that the possible modification is on base 5, (TGAGG\*ATGGGCCTCCGGTTCATG). Table showing the m/z for standard and adducted Fragment 4 is as shown in Table S7.

**Table S7.** Calculated m/z for standard and singly adducted DNA fragments of fragment 3. (m/z highlighted in red were the ions with increased m/z compared to that of standard corresponding to BPDE adducted)

| Fragment ion                   | m/z                    |                          |
|--------------------------------|------------------------|--------------------------|
|                                | Unadducted             | Singly Adducted Fragment |
| a <sub>2</sub> -b <sub>2</sub> | [401.1] <sup>-</sup>   | [401.1] <sup>-</sup>     |
| a <sub>3</sub> -b <sub>3</sub> | [730.2] <sup>-</sup>   | [730.2] <sup>-</sup>     |
| a <sub>4</sub> -b <sub>4</sub> | [1043.3] <sup>-</sup>  | [1043.3] <sup>-</sup>    |
| a <sub>5</sub> -b <sub>5</sub> | [1372.4] <sup>-</sup>  | [1372.4] <sup>-</sup>    |
| a <sub>6</sub> -b <sub>6</sub> | [1702.0] <sup>-</sup>  | [1001.3] <sup>-2</sup>   |
| a <sub>7</sub> -b <sub>7</sub> | [1007.2] <sup>-2</sup> | [1158.8] <sup>-2</sup>   |
| a <sub>8</sub> -b <sub>8</sub> | n/d                    | [1309.9] <sup>-2</sup>   |
| a <sub>9</sub> -b <sub>9</sub> | [1323.8] <sup>-2</sup> | [1474.9] <sup>-2</sup>   |
| w <sub>17</sub>                | [1755.6] <sup>-3</sup> | n/d                      |
| w <sub>18</sub>                | [1395.6] <sup>-3</sup> | n/d                      |
| w <sub>19</sub>                | [1477.9] <sup>-4</sup> | [1242.7] <sup>-5</sup>   |
| w <sub>20</sub>                | [1541.7] <sup>-</sup>  | n/d                      |
| w <sub>21</sub>                | [915.1] <sup>-2</sup>  | n/d                      |

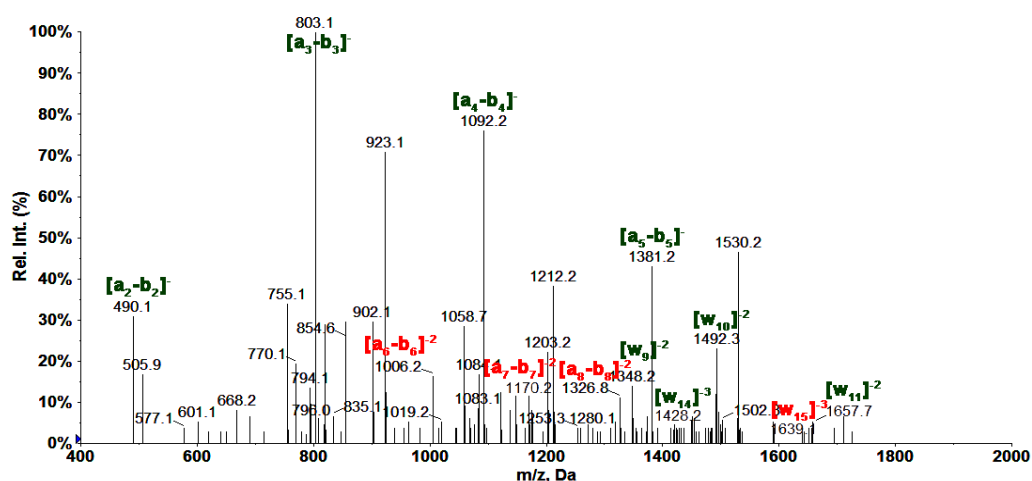

**Figure S8.** LC-MS of ds-32 bp exon 7 probe: MS/MS spectrum of 1530.3 showing a<sub>n</sub>-b<sub>n</sub> and w<sub>n</sub> ions. Ions with m/z similar to standard labeled in green and ions with increased m/z in red in 10mM Tris buffer, pH 7.4 and 0.1M NaCl.

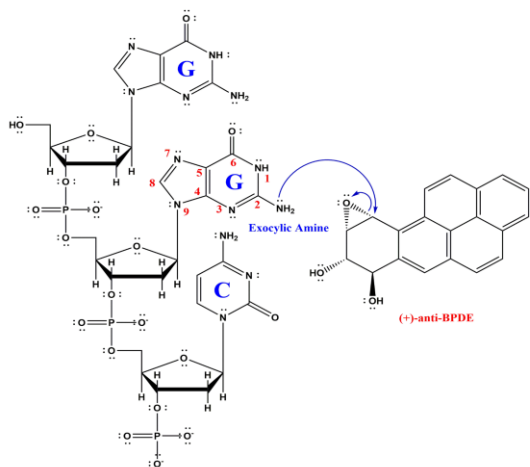

**Scheme S2.** Chemical structure of sequence GGC. Numbering of guanine shown in red. Proposed mechanism for attack of BPDE on exocyclic amine of guanine of DNA.

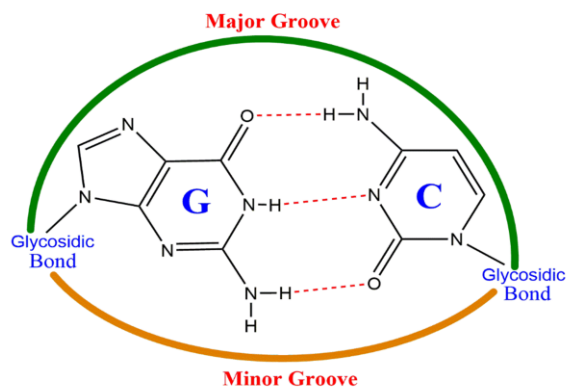

**Scheme S3.** Minor groove and Major groove of GC base pair of duplex DNA.

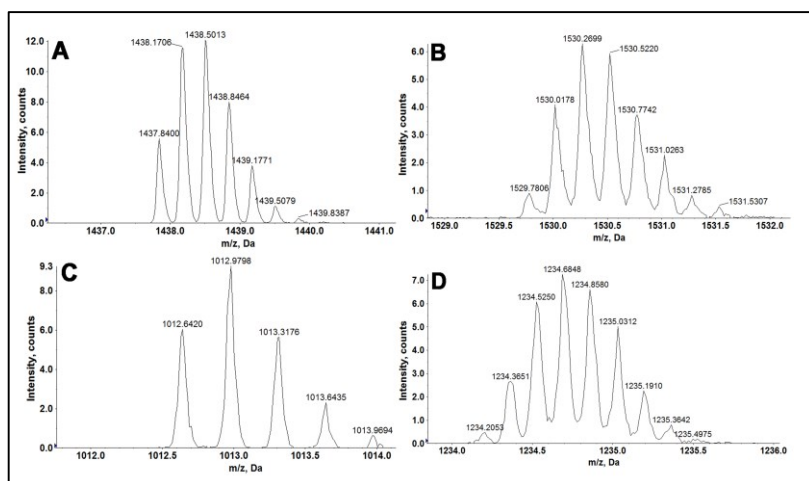

**Figure S9.** Representation of isotopic distribution ds DNA exon 7 probe for obtained ions A) Fragment 1, m/z 1437.8 (-3), B) Fragment 2, m/z 1530.3 (-3) C) Fragment 3, m/z 1012.6 (-3) D) Fragment 4, m/z 1234.4 (-6), measured on a Qstar Elite mass spectrometer (Sciex, USA)

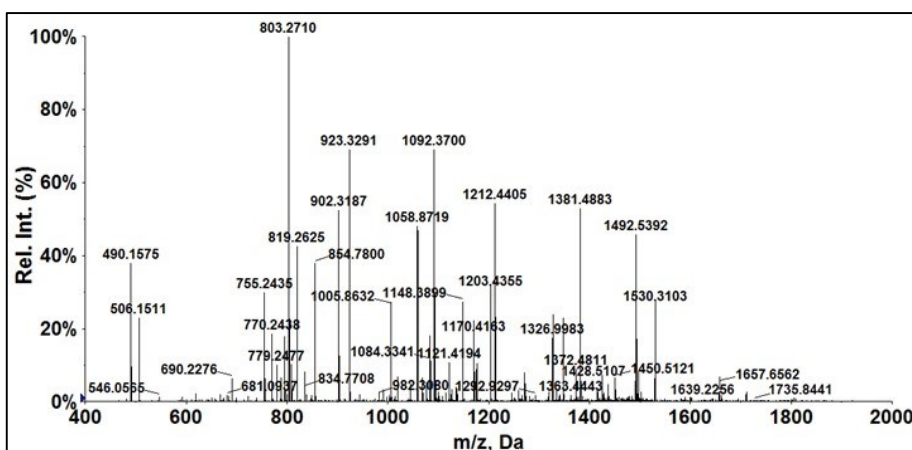

**Figure S10.** LC-MS/MS of ds-32 bp exon 7 probe: Raw data of ToF MS/MS images for Fragment 2.

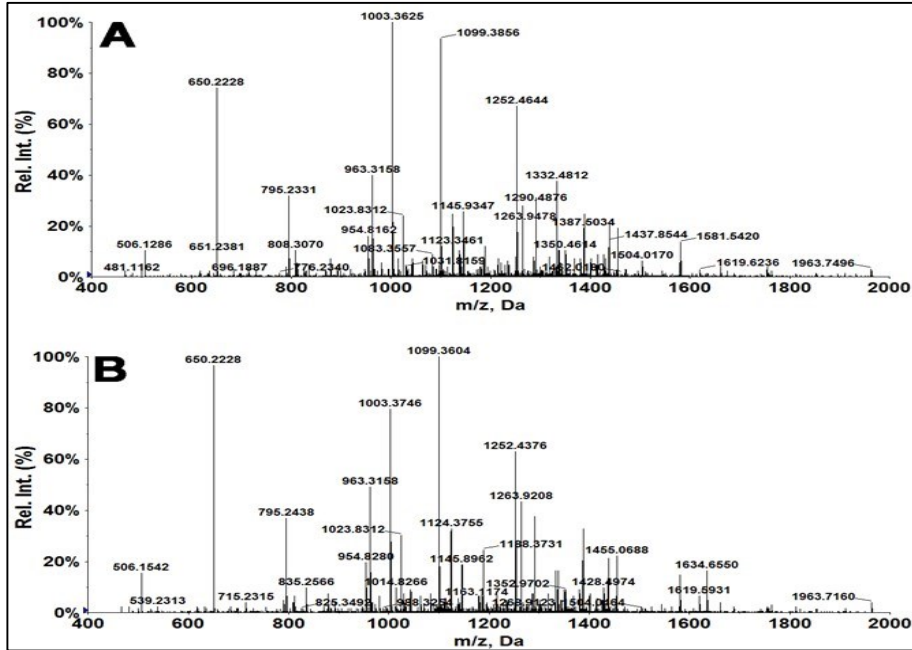

**Figure S11.** LC-MS/MS of ds-32 bp exon 7 probe: Raw data of ToF MS/MS images for Fragment 1 A) Peak 1 B) Peak 2.

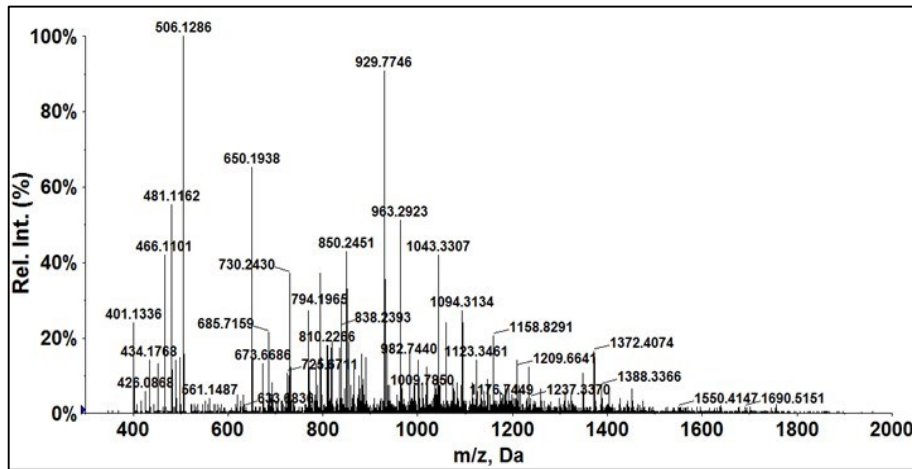

**Figure S12.** LC-MS/MS of ds-32 bp exon 7 probe: Raw data of ToF MS/MS images for Fragment 3.

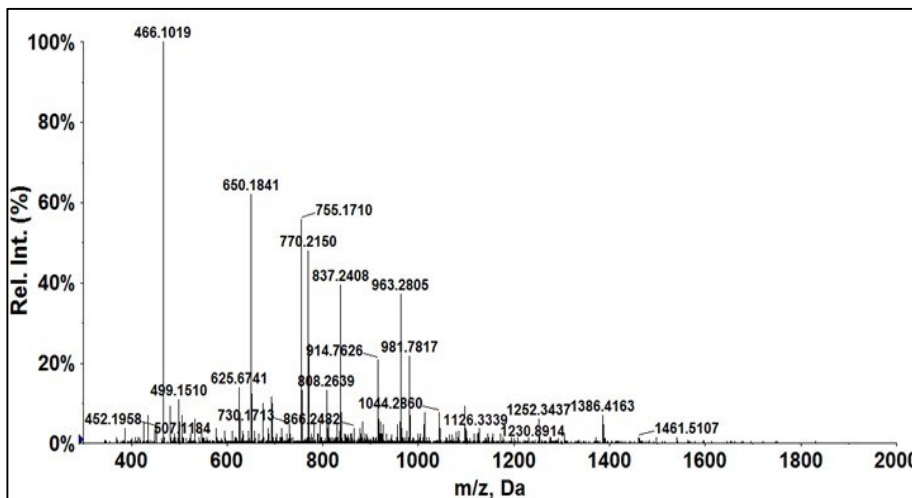

**Figure S13.** LC-MS/MS of ds-32 bp exon 7 probe: Raw data of ToF MS/MS images for Fragment 4.

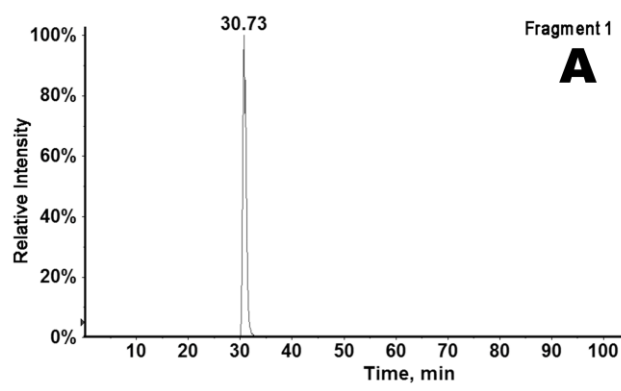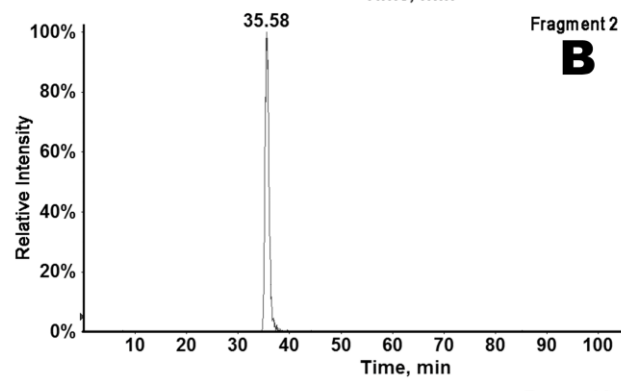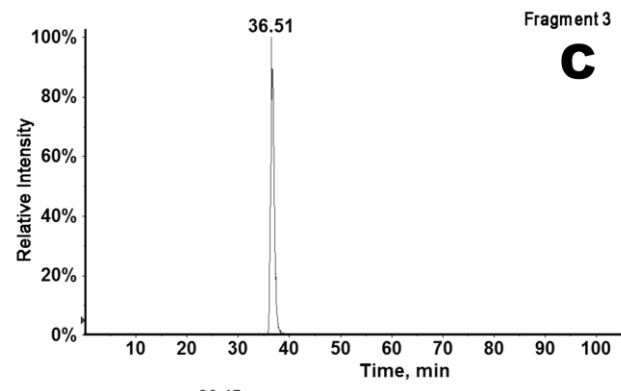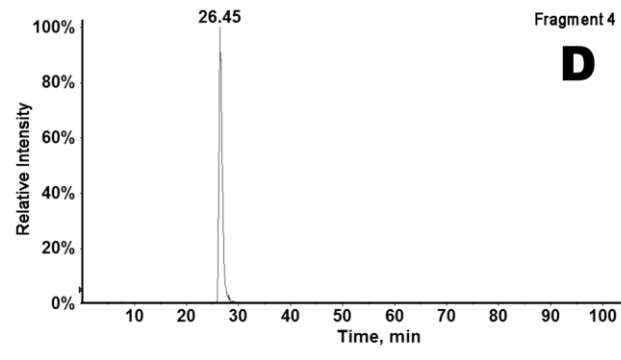

**Figure S14.** Extracted ion chromatogram of standard unadducted fragments of 32 bp ds DNA after NlaIII treatment. (A) XIC of Fragment-1, 13 mer m/z, 1337.5 charge -3. (B) XIC of Fragment-2, 19 mer, m/z 1454.6 charge -4 (C) XIC of Fragment-3, 23 mer m/z 1421.3 charge -5 (D) XIC of Fragment-4, 9 mer m/z 912.2 charge -3.
